# Supplementary material for: Conditional embryonic lethality to improve the sterile insect technique in Ceratitis capitata(Diptera: Tephritidae)
Source: Springer Nature journal article supplement (doi:10.1186/1741-7007-7-4), 2009-01-27
Supplement: Additional file 5 [file 1741-7007-7-4-s5.pdf]

**Additional File 5. Statistical analysis.** ns = non-significant; - = the original data was 0 for all repetitions, statistics are therefore not possible. T-test and chi-test were performed as described in Sokal and Rohlf [1].

(A) Chi-test for the reversibility tests

|              | stat   | df | probability | significance |
|--------------|--------|----|-------------|--------------|
| Day 1 (+Tc)  | 0,0008 | 1  | 0,9768      | ns           |
| Day 2 (+Tc)  | 0,0067 | 1  | 0,9348      | ns           |
| Day 3 (-Tc)  | 0,0152 | 1  | 0,9020      | ns           |
| Day 4 (-Tc)  | 0,0098 | 1  | 0,9213      | ns           |
| Day 5 (-Tc)  | 0,0120 | 1  | 0,9127      | ns           |
| Day 6 (-Tc)  | 0,0139 | 1  | 0,9060      | ns           |
| Day 7 (-Tc)  | -      | -  | -           | ns           |
| Day 8 (+Tc)  | 0,0314 | 1  | 0,8593      | ns           |
| Day 9 (+Tc)  | 0,0088 | 1  | 0,9251      | ns           |
| Day 10 (+Tc) | 0,0059 | 1  | 0,9389      | ns           |

(B) T-test for the efficiency tests.

|        |           | stat   | df | probability | significance |
|--------|-----------|--------|----|-------------|--------------|
| LL #29 | L1 larvae | 4,9448 | 2  | 0,1270      | ns           |
|        | pupae     | 0,1624 | 2  | 0,8975      | ns           |
|        | adults    | 0,1177 | 2  | 0,9254      | ns           |
| LL #72 | L1 larvae | 2,2391 | 2  | 0,2673      | ns           |
|        | pupae     | 0,8260 | 2  | 0,5604      | ns           |
|        | adults    | 1,4728 | 2  | 0,3797      | ns           |
| LL #66 | L1 larvae | 1,6379 | 2  | 0,3489      | ns           |
|        | pupae     | -      | -  | -           | -            |
|        | adults    | -      | -  | -           | -            |
| LL #67 | L1 larvae | -      | -  | -           | -            |
|        | pupae     | -      | -  | -           | -            |
|        | adults    | -      | -  | -           | -            |
| LL #68 | L1 larvae | 0,6821 | 2  | 0,6188      | ns           |
|        | pupae     | 0,2245 | 2  | 0,8593      | ns           |
|        | adults    | -      | -  | -           | -            |
| WT     | L1 larvae | 1,6911 | 2  | 0,3399      | ns           |
|        | pupae     | 1,3158 | 2  | 0,4137      | ns           |
|        | adults    | 1,9443 | 2  | 0,3024      | ns           |

(C) T-test for the competition tests. Ratios describe WT females: WT males: transgenic males.

|                | stat   | df | probability | significance |
|----------------|--------|----|-------------|--------------|
| 1:1:0          | 0,9017 | 10 | 0,4182      | ns           |
| 1:1:1 (LL #66) | 0,7000 | 10 | 0,5151      | ns           |
| 1:1:3 (LL #66) | 1,0101 | 10 | 0,3588      | ns           |
| 1:1:5 (LL #66) | 1,4861 | 10 | 0,1974      | ns           |
| 1:1:9 (LL #66) | 1,0613 | 10 | 0,3371      | ns           |
| 1:1:1 (LL #67) | 0,1265 | 10 | 0,9043      | ns           |
| 1:1:3 (LL #67) | 0,0690 | 10 | 0,9477      | ns           |
| 1:1:5 (LL #67) | 1,7320 | 10 | 0,1438      | ns           |
| 1:1:9 (LL #67) | 1,4029 | 10 | 0,2196      | ns           |
| 1:10:0         | 0,0987 | 10 | 0,9261      | ns           |

## Reference

1. Sokal RR, Rohlf FJ: Biometry: the principles and practice of statistics in biological research, 3rd edn. New York, NY: W.H. Freeman and Co.; 1995.
